# Supplementary material
Source: publisher figshare collection journal article supplement (https://sage.figshare.com/ndownloader/files/27627136)
Supplement: Supplementary file 1 [file 27627136]

**Supplementary Table 1. VS-related diagnosis and frequencies.**

| <b>VS diagnosis</b>                       | <b>N° (%) of patients</b> |
|-------------------------------------------|---------------------------|
| CVI                                       | 81 (36.3)                 |
| PAD                                       | 58 (26)                   |
| DVT                                       | 16 (7.2)                  |
| Abdominal Aortic Aneurysm                 | 12 (5.4)                  |
| Post-thrombotic Syndrome                  | 10 (4.5)                  |
| Arterio-venous fistulas                   | 10 (4.5)                  |
| Atherosclerotic Carotid Artery Disease    | 5 (2.2)                   |
| Superficial Thrombophlebitis              | 4 (1.8)                   |
| Thoracic/Thoracoabdominal Aortic Aneurysm | 4 (1.8)                   |
| Carotid Body Tumors                       | 3 (1.3)                   |
| Lymphedema                                | 3 (1.3%)                  |
| Other diagnosis*                          | 17 (7.6%)                 |

*VS=Vascular Surgery. CVI=Chronic Venous Insufficiency. PAD=Peripheral Artery Disease. DVT=Deep Venous Thrombosis. \*Each patient had an additional diagnosis to those above mentioned.*

**Supplementary table 2. Distribution of pharmacologic interventions in the study population.**

| <b>Pharmacologic therapies</b> | <b>N° (%) of patients</b> |
|--------------------------------|---------------------------|
| Acetyl salicylic acid          | 54 (24.2)                 |
| Clopidogrel                    | 9 (4)                     |
| Statin                         | 44 (19.7)                 |
| Anticoagulation                | 29 (13)                   |
| Diosmin and Hesperidin         | 32 (14.3)                 |
| Cilostazol                     | 21 (9.4)                  |
| Sulodexide                     | 6 (2.7)                   |
| Pentoxifylline                 | 5 (2.2)                   |

*N°= Number of patients*

**Supplementary table 3. Distribution of non-pharmacologic interventions in the study population.**

| <b>Interventions</b>              | <b>N° (%) of patients</b> |
|-----------------------------------|---------------------------|
| Exercise therapy for claudication | 36 (16.1)                 |
| Moderate compression stockings    | 62 (27.8)                 |
| High compression stockings        | 11 (4.9)                  |
| Compression bandages              | 13 (5.8)                  |

*N° = Number of patients*

**Supplementary table 4. Distribution of comorbidities in the study population.**

| <b>Comorbid conditions</b> | <b>N° (%) of patients</b> |
|----------------------------|---------------------------|
| Diabetes Mellitus          | 94 (42.2)                 |
| Hypertention               | 127 (57)                  |
| Dyslipidemia               | 61 (27.4)                 |
| Cardiovascular Disease     | 27 (12.1)                 |
| Cerebrovascular Disease    | 10 (4.5)                  |
| Rheumatologic Diseases     | 36 (16.1)                 |
| Neoplasias                 | 24 (10.8)                 |
| Other comorbidities        | 88 (39.5)                 |
